# Supplementary material for: The effects of tributyltin oxide and deoxynivalenol on the transcriptome of the mouse thymoma cell line EL-4
Source: Royal Society of Chemistry journal article supplement (doi:10.1039/c3tx50100k), 2014-02-26

## TBTO

Left picture: Filter on at least  $2 > |0.7|$ : 5196 spots.  
Right picture: filter  $3 > |0.7|$ : 1436 spots were affected  
(as in article).  
Most spots affected by the two arrays 1  $\mu\text{M}$  DON are  
also up or down regulated by 0.5  $\mu\text{M}$

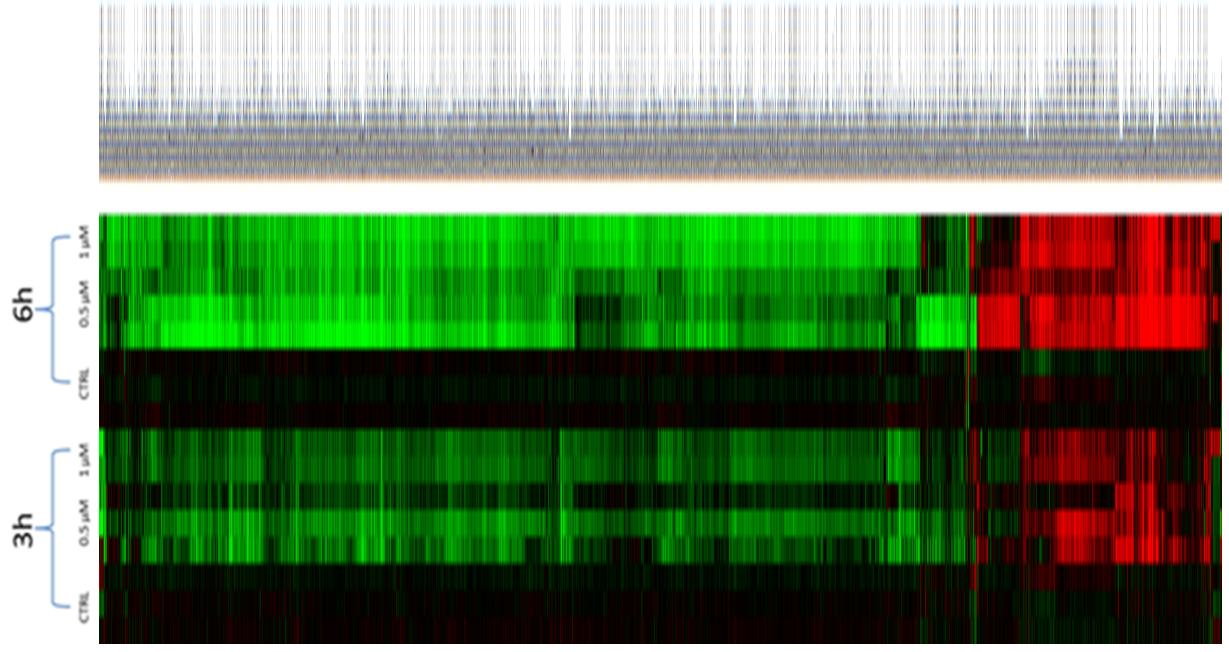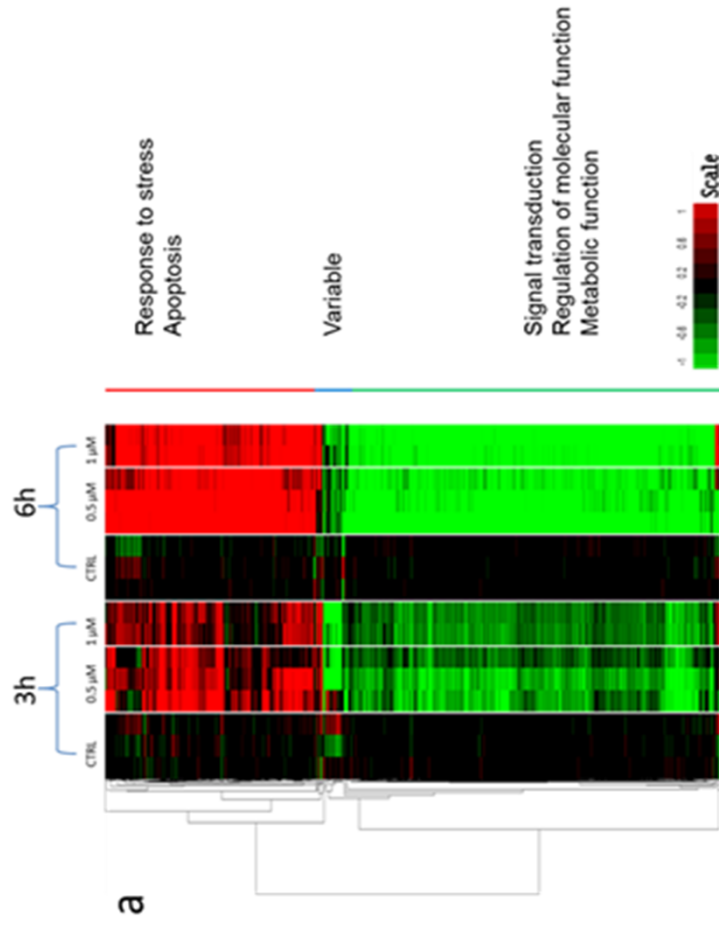

DON

Left picture: Filter on at least  $2 > |0.7|$ : 1519 spots.

Right picture: For  $3 \times |0.7|$ : 717 spots were affected (as in article).

Most spots affected by the two arrays  $1 \mu\text{M}$  DON are also up or down regulated by  $0.5 \mu\text{M}$  but with a lower ratio

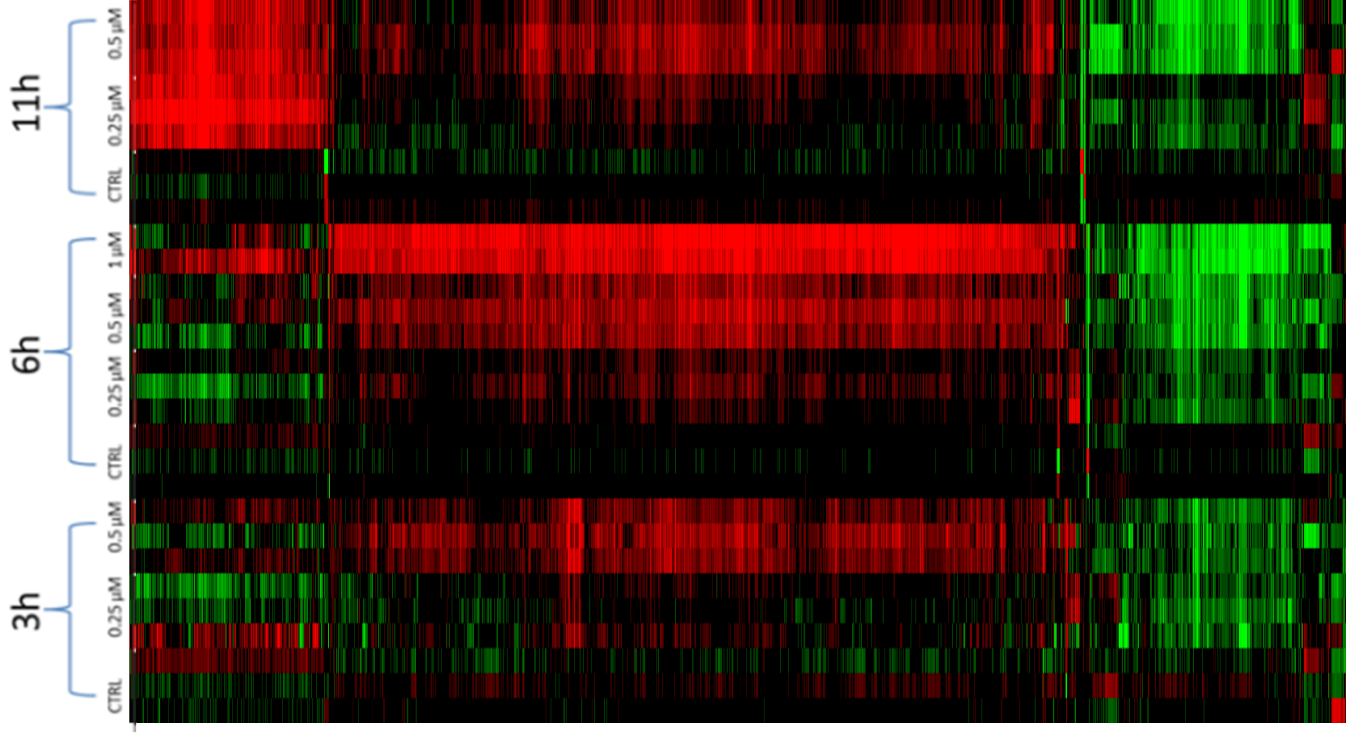

1519 spots affected by the two arrays 1  $\mu\text{M}$  DON are also up or down regulated by 0.5  $\mu\text{M}$  but with a lower ratio

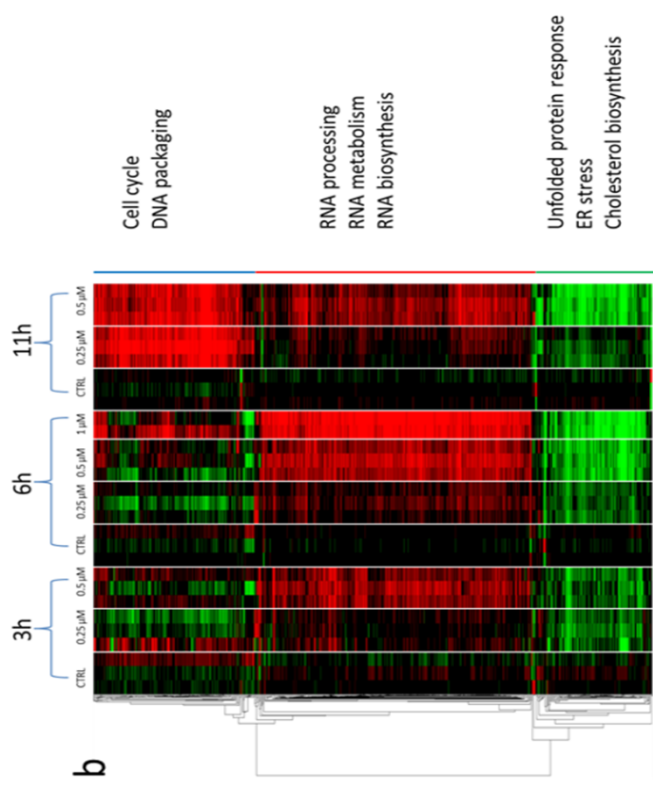

Supplement: c3tx50100k1.pdf [file c3tx50100k1.pdf]
