# Supplementary material for: The effects of tributyltin oxide and deoxynivalenol on the transcriptome of the mouse thymoma cell line EL-4
Source: Royal Society of Chemistry journal article supplement (doi:10.1039/c3tx50100k), 2014-02-26

## 1a DON Ribosome biogenesis and assembly

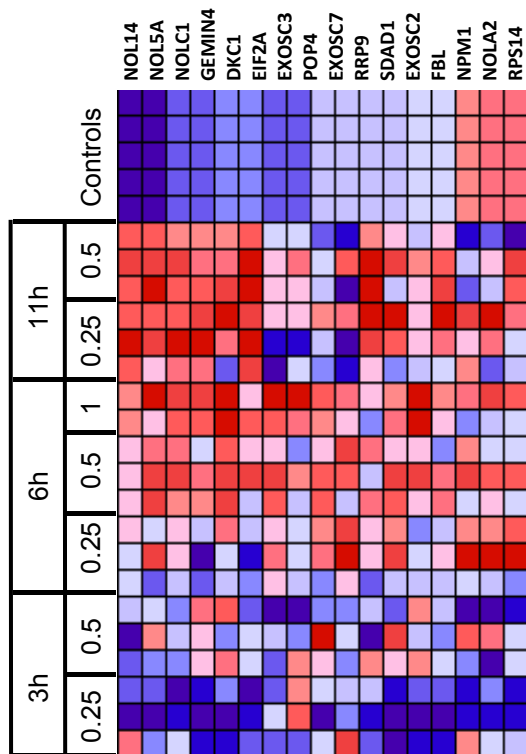

**Supplementary Fig. 1** Heat maps of genes involved in the structure and function of ribosomes and RNA related processes. The effect of DON on gene sets (a) 'ribosome biogenesis and assembly', (b) 'RNA processing' and (c) 'mRNA metabolic process'. Heat maps were created in GSEA containing 2log ratios of treatment vs. the average of the control at the same time point. For visualization, five columns containing zeros were added, representing the relative expression of the control samples. Colours represent relative gene expression levels, blue indicates low expression, red indicates high expression.

# 1b DON RNA processing

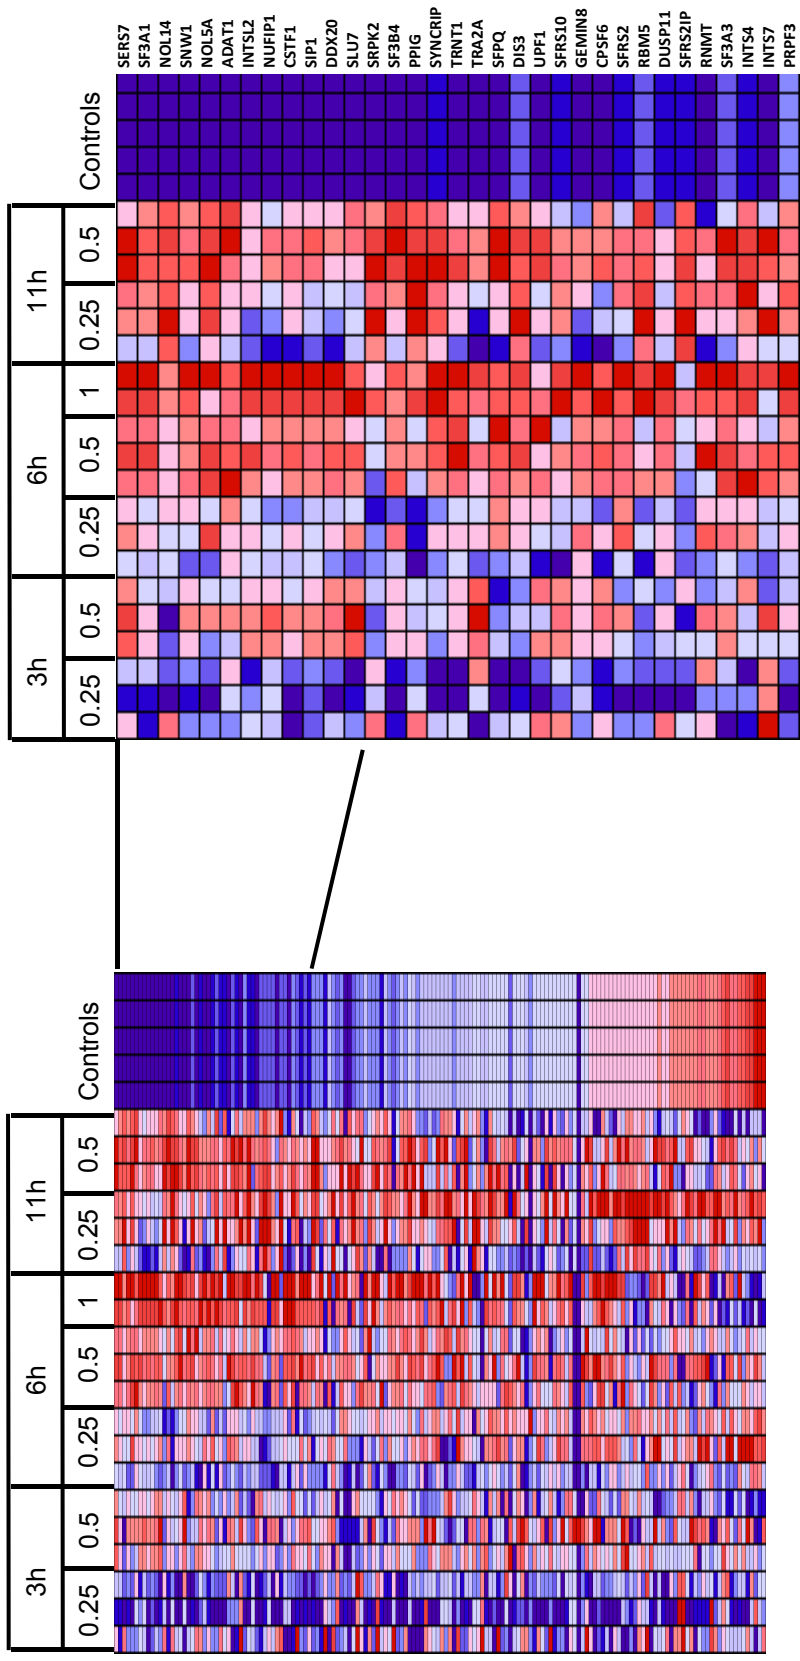

# 1c DON - mRNA metabolic process

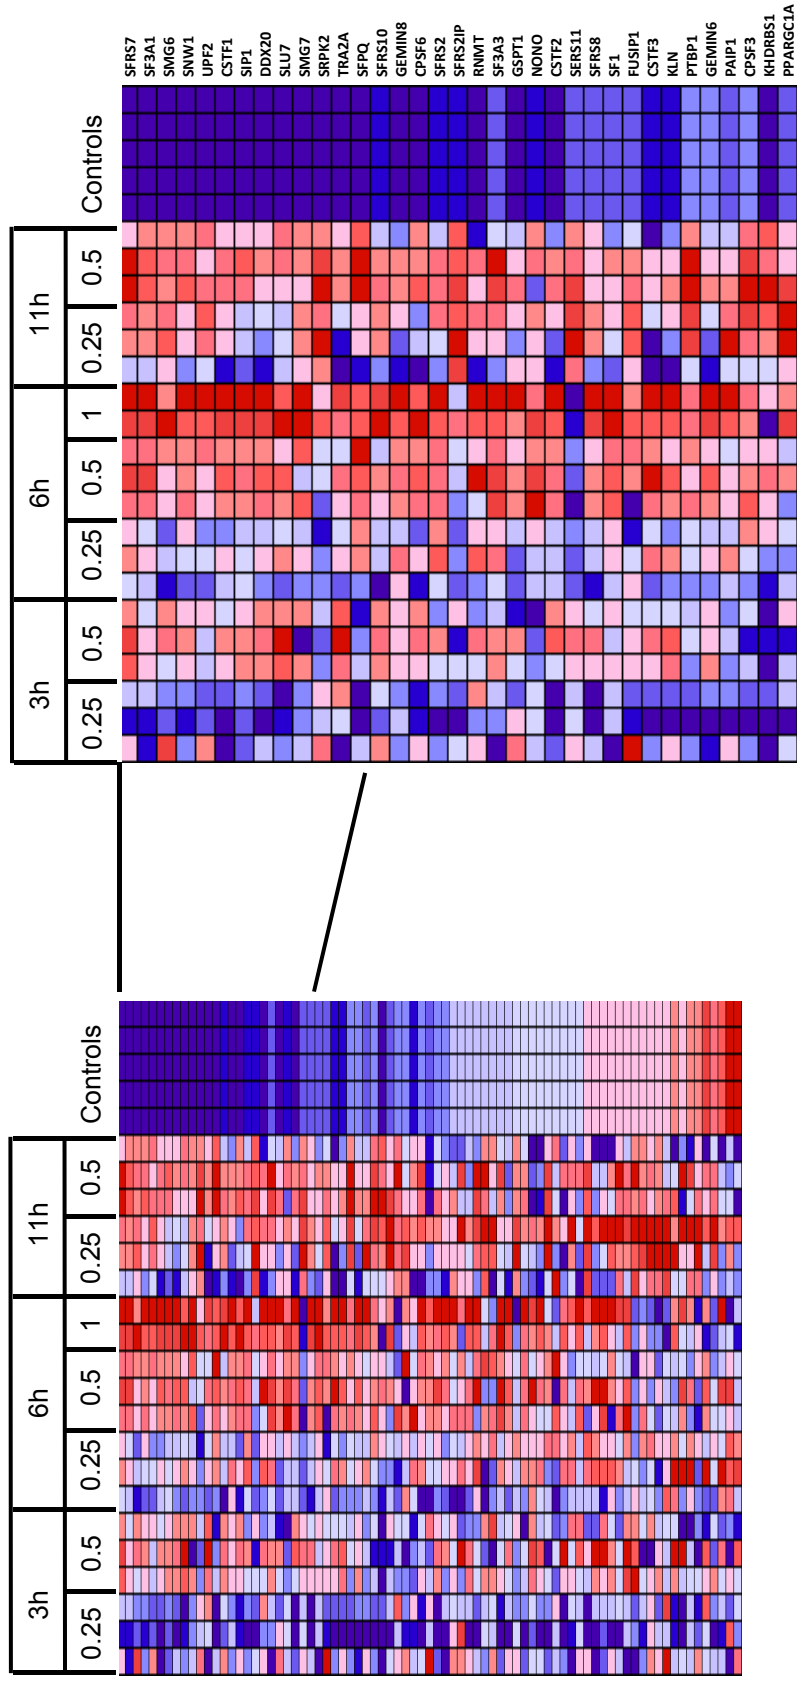

Supplement: c3tx50100k2.pdf [file c3tx50100k2.pdf]
